# Supplementary material
Source: publisher figshare collection journal article supplement (https://karger.figshare.com/ndownloader/files/9545650)
Supplement: Supplementary file 1 [file 9545650]

# ABO, Rhesus, and Kell Antigens, Alleles, and Haplotypes in West Bengal, India

Debapriya Basu Suvro Sankha Datta Celina Montemayor  
Prasun Bhattacharya Krishnendu Mukherjee Willy A. Flegel

<sup>a</sup>Department of Immunohematology and Blood Transfusion, Medical College Hospital, Kolkata, India; <sup>b</sup>Department of Transfusion Medicine, The Mission Hospital, Durgapur, India; <sup>c</sup>NIH Clinical Center, National Institutes of Health, Bethesda MD, USA

## Supplemental Material

## Supplementary Material and Methods

### *Immunohematology*

Blood group serology was done with conventional tube method, as described previously.<sup>9-11</sup> The study was prospective observational, as the blood donors were tested at the time of their blood donation during the 18 months' study period.

### *Blood Group Test Reagents*

The antisera were anti-A (clone no. 11H5), anti-B (clone no. 6F9), anti-A,B (clones 11H5 and 6F9), anti-D (clone P3×61; all monoclonal antibodies); and anti-H (*Ulex europaeus* lectin, all from Tulip Diagnostics, Goa, India); as well as anti-C (clone MS-24), anti-E (clone MS-260), anti-c (clone MS-33), anti-e (clones MS-16, MS-21, and MS-63), anti-K (clone MS-56; all human monoclonal antibodies), and anti-k (human polyclonal antibody, lot no. 10640.4310 and 10640.4440; all from DiaMed/Bio-Rad, Cressier-sur Murat, Switzerland).

### *Confirmation of D Negative Phenotype*

All samples that tested D negative were confirmed by a weak D test using anti-D (clone MCAD6, IgG; Tulip Diagnostics) and a polyspecific antiglobulin reagent (anti-human globulin and anti-C3d; DiaMed/BioRad) in tube technique. A reaction of 1+ to 4+ agglutination strength was recorded as positive for the serologic weak D phenotype. This approach is widely applied as standard operating procedure in blood banks worldwide.<sup>12</sup> In the absence of macroscopic agglutination in the tube, we checked for a positive reaction microscopically. No sample among the 52 D negative donors was weak D or microscopically positive.

### *Confirmation of K Negative Phenotype*

We assumed a kk phenotype (table 1), if the anti-K reacted negative (no test with anti-k). If a sample reacted positive with the anti-K, we tested with anti-k to distinguish the KK and Kk phenotypes. This approach is widely applied as standard operating procedure in blood banks worldwide.

**Supplemental fig. 1.** Estimates for *RH* haplotypes. The iteration steps and results are shown for the counting method.

| Phenotype | Rh phenotypes observed (n) |
|-----------|----------------------------|
| CcDee     | 424                        |
| CCDee     | 749                        |
| CcDEe     | 210                        |
| ccDEe     | 52                         |
| ccDEE     | 11                         |
| ccDee     | 15                         |
| CCDEe     | 11                         |
| CcDEE     | 0                          |
| CCDEE     | 4                          |
| ccddee    | 42                         |
| Ccddee    | 8                          |
| CCddee    | 0                          |
| CcddEe    | 0                          |
| CCddEe    | 0                          |
| ccddEe    | 2                          |
| ccddEE    | 0                          |
| CcddEE    | 0                          |
| CCddEE    | 0                          |
| Total     | 1528                       |

KEY:

|   |     |
|---|-----|
| A | CDE |
| B | cDE |
| C | CDe |
| D | cDe |
| E | CdE |
| F | cdE |
| G | Cde |
| H | cde |

| pA       | Priors   |          |          |          |          |          |          |     |
|----------|----------|----------|----------|----------|----------|----------|----------|-----|
|          | pB       | pC       | PD       | pE       | pF       | pG       | pH       |     |
| 0.1      | 0.1      | 0.1      | 0.1      | 0.1      | 0.1      | 0.1      | 0.1      | 0.3 |
| 0.038613 | 0.03534  | 0.457461 | 0.084751 | 0.010798 | 0.014725 | 0.203534 | 0.154123 |     |
| 0.020942 | 0.060209 | 0.535995 | 0.082134 | 0.002618 | 0.016034 | 0.150524 | 0.131545 |     |
| 0.011453 | 0.073298 | 0.581806 | 0.07788  | 0.000982 | 0.014398 | 0.116165 | 0.124673 |     |
| 0.008508 | 0.079188 | 0.608639 | 0.073953 | 0.000654 | 0.012107 | 0.092605 | 0.125    |     |
| 0.007199 | 0.081479 | 0.626636 | 0.069699 | 0.000654 | 0.010471 | 0.075589 | 0.128272 |     |
| 0.007199 | 0.083115 | 0.639398 | 0.065445 | 0.000654 | 0.008835 | 0.062827 | 0.132526 |     |
| 0.007199 | 0.084424 | 0.649215 | 0.061518 | 0.000654 | 0.007853 | 0.05301  | 0.13678  |     |
| 0.006872 | 0.085079 | 0.656741 | 0.056937 | 0.000654 | 0.006872 | 0.045157 | 0.14038  |     |
| 0.006872 | 0.085733 | 0.662958 | 0.053338 | 0.000654 | 0.006217 | 0.039267 | 0.144306 |     |
| 0.007199 | 0.086715 | 0.668521 | 0.050065 | 0.000654 | 0.005563 | 0.034686 | 0.147906 |     |
| 0.006872 | 0.087042 | 0.67212  | 0.046793 | 0.000654 | 0.005236 | 0.030432 | 0.150851 |     |
| 0.006872 | 0.087042 | 0.675065 | 0.043848 | 0.000654 | 0.004908 | 0.026832 | 0.153469 |     |
| 0.006872 | 0.087369 | 0.678338 | 0.041558 | 0.000654 | 0.004908 | 0.024215 | 0.156086 |     |
| 0.006872 | 0.087696 | 0.679974 | 0.039594 | 0.000654 | 0.004908 | 0.022251 | 0.15805  |     |
| 0.006872 | 0.087369 | 0.681937 | 0.037958 | 0.000654 | 0.004908 | 0.020615 | 0.159686 |     |
| 0.006872 | 0.087696 | 0.683246 | 0.036649 | 0.000654 | 0.004908 | 0.019306 | 0.161322 |     |
| 0.007199 | 0.087696 | 0.684555 | 0.035668 | 0.000654 | 0.004908 | 0.017997 | 0.162631 |     |
| 0.007199 | 0.087369 | 0.685537 | 0.034359 | 0.000654 | 0.004908 | 0.017016 | 0.163613 |     |
| 0.007199 | 0.087696 | 0.686191 | 0.033377 | 0.000654 | 0.004908 | 0.016361 | 0.164921 |     |
| 0.007199 | 0.087696 | 0.686518 | 0.032395 | 0.000654 | 0.004581 | 0.016034 | 0.165576 |     |
| 0.007199 | 0.087369 | 0.686846 | 0.031414 | 0.000654 | 0.004254 | 0.01538  | 0.16623  |     |
| 0.007199 | 0.087696 | 0.687173 | 0.030759 | 0.000654 | 0.003927 | 0.015052 | 0.166885 |     |
| 0.007199 | 0.088351 | 0.688154 | 0.030105 | 0.000654 | 0.003927 | 0.014398 | 0.167866 |     |
| 0.007199 | 0.088351 | 0.688154 | 0.02945  | 0.000654 | 0.003927 | 0.014071 | 0.168194 |     |
| 0.007199 | 0.088351 | 0.688809 | 0.029123 | 0.000654 | 0.003927 | 0.013743 | 0.168848 |     |
| 0.007199 | 0.088351 | 0.688809 | 0.028796 | 0.000654 | 0.003927 | 0.013743 | 0.169175 |     |
| 0.007199 | 0.088351 | 0.688482 | 0.028469 | 0.000654 | 0.003927 | 0.013743 | 0.169175 |     |
| 0.007199 | 0.088024 | 0.688809 | 0.028141 | 0.000654 | 0.003927 | 0.013743 | 0.169503 |     |
| 0.007199 | 0.088024 | 0.688809 | 0.027814 | 0.000654 | 0.003927 | 0.013743 | 0.16983  |     |
| 0.007199 | 0.088024 | 0.688809 | 0.027814 | 0.000654 | 0.003927 | 0.013743 | 0.16983  |     |
| 0.007199 | 0.088024 | 0.688809 | 0.027814 | 0.000654 | 0.003927 | 0.013743 | 0.16983  |     |
| 0.007199 | 0.088024 | 0.688809 | 0.027814 | 0.000654 | 0.003927 | 0.013743 | 0.16983  |     |

## Alternative Method for Calculation of Allele Frequencies

### *ABO Phenotypes and Allele Frequencies*

We observed the ABO antigens as B = 33.77%, O = 32.07%, A = 25.13% and AB = 9.03%.

Using an iterative method to determine maximum-likelihood estimates, the ABO allele frequencies were calculated as  $O = 0.566$ ,  $A = 0.189$ ,  $B = 0.244$  (Table 1).

Alternatively, the allele frequencies are often calculated by the following method:<sup>16</sup>

The ABO system is determined by 3 alleles ( $A$ ,  $B$  and  $O$ ) of a single gene.  $A$  and  $B$  are co-dominant, and both are dominant over  $O$ . The alleles in the population are in a Hardy-Weinberg equilibrium.

Frequency of  $A$  allele ( $F_A$ ) =  $X$

Frequency of  $B$  allele ( $F_B$ ) =  $Y$

Frequency of  $O$  allele ( $F_O$ ) =  $Z$

Calculation of  $O$  allele frequency ( $Z$ )

$Z^2 =$  Prevalence  $O$  phenotype = 0.3207

$Z = \sqrt{Z^2} = \sqrt{0.3207}$

$Z = 0.567$

Calculation of  $A$  allele frequency ( $X$ )

$X^2 + 2ZX + Z^2 = (Z + X)^2$

$Z + X = \sqrt{(X^2 + 2XZ + Z^2)}$

$X = \sqrt{(X^2 + 2XZ + Z^2)} - Z$

Assuming the alleles are in a Hardy-Weinberg equilibrium, we may conclude:

$AA = X^2$   $AO = 2ZX$   $OO = Z^2$

Prevalence of  $A$  antigen =  $X^2 + 2ZX = 0.2513$

$X = \sqrt{(0.2513 + 0.3207)} - 0.5663$

$X = \sqrt{0.572} - 0.5663$

$X = 0.7563 - 0.5663$

$X = 0.19$

Calculation of  $B$  allele frequency ( $Y$ )

$X + Y + Z = 1$

$Y = 1 - (X + Z)$

$Y = 1 - (0.19 + 0.5663)$

$Y = 1 - 0.7563$

$Y = 0.2437$

Then, the genotype distribution in the study population is calculated:

$AA = X^2 = 0.04$   $AO = 2XZ = 0.22$   $BB = Y^2 = 0.06$

$BO = 2YZ = 0.28$   $AB = 2XY = 0.09$   $OO = Z^2 = 0.32$

### *Kell Phenotypes and Allele Frequencies*

We observed the KEL antigens as  $K = 0.79\%$  ( $n = 12$ ) and  $k = 99.21\%$ .

Using an iterative method to determine maximum-likelihood estimates, the KEL allele frequencies were calculated as  $K = 0.004$  and  $k = 0.996$  (Table 1).

Alternatively, the allele frequency are often calculated by the following method:<sup>16</sup>

The KEL system is determined by 2 alleles ( $K$  and  $k$ ) of a single gene.  $K$  and  $k$  are co-dominant. The alleles in the population are in a Hardy-Weinberg equilibrium.

Frequency of  $K$  allele =  $A$

Frequency of  $k$  allele =  $B$

Frequency of  $KK$  genotype =  $A^2$

Frequency of  $Kk$  genotype =  $2AB$

Frequency of  $kk$  genotype =  $B^2$

Assuming the alleles are in a Hardy-Weinberg equilibrium, we may conclude:

$K = 0.79\%$  and  $A^2 + 2AB = 0.0079$

Because  $A^2 + 2AB + B^2 = 1$ , it follows that  $B^2 = 1 - (A^2 + 2AB)$

$B^2 = 1 - 0.0079 = 0.9921$

$B = 0.996$

Because  $A + B = 1$ , it follows that  $A = 1 - 0.996 = 0.004$

Hence, the frequency of the  $K$  allele is 0.004 and the  $k$  allele is 0.996.

Then, the genotype distribution in the study population is calculated:

$KK = A^2 = 0.000016$   $Kk = 2AB = 0.008$   $kk = B^2 = 0.992$

#### *Rhesus Phenotypes and Haplotype Frequencies*

In the RH blood group system, there is no straightforward way to calculate haplotypes<sup>16</sup> from phenotype data (table 2), because a large number of antigens and concatenated *RHCE* and *RHD* alleles (haplotypes) is involved.

Using the counting method of Ceppellini et al.,<sup>13</sup> allowed to determine maximum-likelihood estimates (table 3) in an iterative process.
